# Supplementary material
Source: Springer Nature journal article supplement (https://www.springermedizin.de/resource/supplementary/13054_2012_1069_MOESM5_ESM.pdf/9711132)

**A**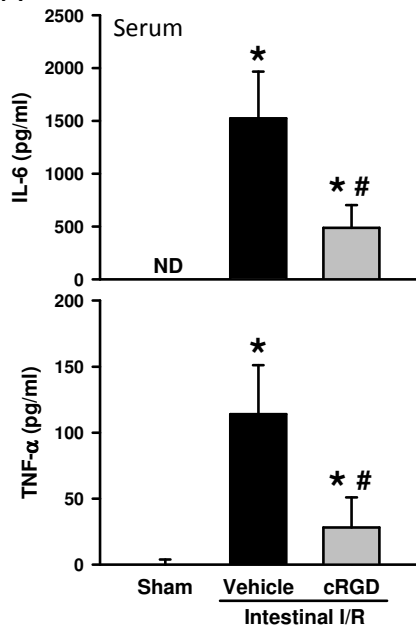**B**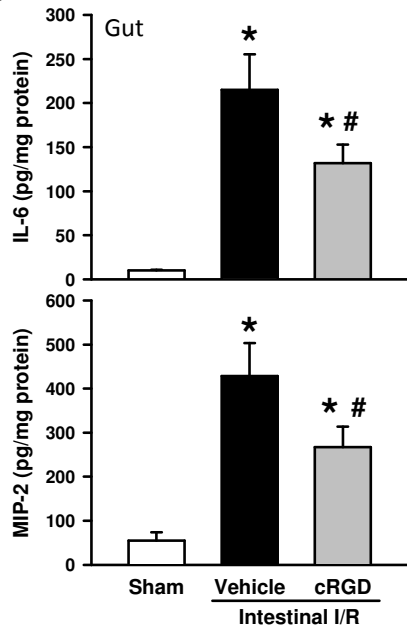**C**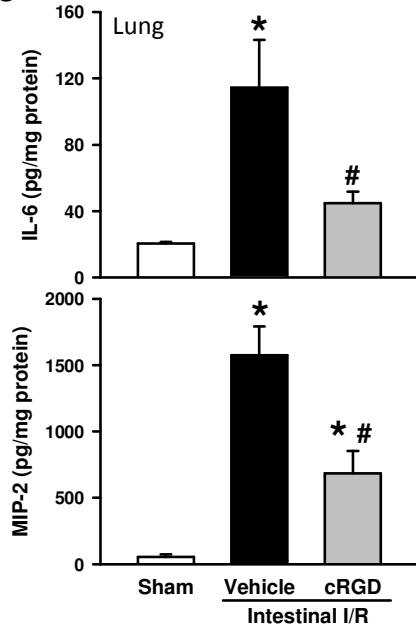

Supplement: MOESM5 [file 9711132]
